# Supplementary material for: Occupational cold exposure and symptoms of carpal tunnel syndrome – a population-based study
Source: Springer Nature journal article supplement (doi:10.1186/s12891-022-05555-8), 2022-06-21
Supplement: MOESM1 [file 23188798]

**Additional file 1**

Title of paper: Occupational cold exposure and symptoms of carpal tunnel syndrome – a population-based study

Authors: Albin Stjernbrandt, Per Vihlborg, Viktoria Wahlström, Jens Wahlström, Charlotte Lewis

Journal: BMC Musculoskeletal Disorders

**Table 4** Gender-stratified symptom-based case definition for carpal tunnel syndrome

| <b>Variable</b>                                                   | <b>Male</b><br>N (%) | <b>Female</b><br>N (%) |
|-------------------------------------------------------------------|----------------------|------------------------|
| Having tingling or numbness in the thumb, index and middle finger | 291 (12.8%)          | 367 (13.8%)            |
| Having nocturnal numbness in the hands                            | 328 (14.4%)          | 560 (21.0%)            |
| Positive answers to both items above (case definition)            | 180 (8.0%)           | 273 (10.3%)            |

**Table 5** Gender-stratified logistic regression for occupational cold exposure in relation to reporting symptoms of carpal tunnel syndrome

| Gender | Exposure variable      | Exposure level<br>(Proportion of working hours) | Carpal tunnel syndrome<br>N (%) | References               | Simple analyses          | Multiple analyses <sup>a</sup> |
|--------|------------------------|-------------------------------------------------|---------------------------------|--------------------------|--------------------------|--------------------------------|
|        |                        |                                                 |                                 | N (%)                    | Crude OR (95% CI)        | Adjusted OR (95% CI)           |
| Male   | Contact cooling        | Never                                           | 65 (40.6)                       | 1,151 (61.2)             | Reference                | Reference                      |
|        |                        | One tenth                                       | 43 (26.9)                       | 440 (23.4)               | <b>1.73 (1.16–2.58)</b>  | 1.28 (0.81–2.03)               |
|        |                        | One quarter                                     | 20 (12.5)                       | 140 (7.4)                | <b>2.53 (1.49–4.30)</b>  | 1.66 (0.90–3.07)               |
|        |                        | Half                                            | 10 (6.3)                        | 67 (3.6)                 | <b>2.64 (1.30–5.38)</b>  | 1.89 (0.86–4.14)               |
|        |                        | Three quarters                                  | 12 (7.5)                        | 51 (2.7)                 | <b>4.17 (2.12–8.20)</b>  | <b>2.63 (1.22–5.64)</b>        |
|        |                        | Almost always                                   | 10 (6.3)                        | 31 (1.6)                 | <b>5.71 (2.68–12.16)</b> | <b>3.86 (1.69–8.82)</b>        |
|        |                        | Ambient cooling                                 | Never                           | 59 (36.9)                | 961 (51.3)               | Reference                      |
|        | One tenth              | 42 (26.3)                                       | 471 (25.1)                      | 1.45 (0.96–2.19)         | 1.12 (0.71–1.77)         |                                |
|        | One quarter            | 26 (16.3)                                       | 205 (10.9)                      | <b>2.07 (1.27–3.36)</b>  | 1.44 (0.83–2.49)         |                                |
|        | Half                   | 11 (6.9)                                        | 131 (7.0)                       | 1.37 (0.70–2.67)         | 0.94 (0.45–1.94)         |                                |
|        | Three quarters         | 12 (7.5)                                        | 51 (2.7)                        | <b>3.83 (1.94–7.58)</b>  | <b>2.70 (1.29–5.69)</b>  |                                |
|        | Almost always          | 10 (6.3)                                        | 55 (2.9)                        | <b>2.96 (1.44–6.10)</b>  | 1.90 (0.86–4.20)         |                                |
|        | Severe ambient cooling | Never                                           | 59 (37.1)                       | 1,092 (58.2)             | Reference                | Reference                      |
|        | One tenth              | 44 (27.7)                                       | 493 (26.3)                      | <b>1.65 (1.10–2.48)</b>  | 1.39 (0.89–2.17)         |                                |
|        | One quarter            | 23 (14.5)                                       | 137 (7.3)                       | <b>3.11 (1.86–5.19)</b>  | <b>2.23 (1.26–3.96)</b>  |                                |
|        | Half                   | 15 (9.4)                                        | 83 (4.4)                        | <b>3.35 (1.82–6.15)</b>  | <b>2.34 (1.19–4.63)</b>  |                                |
|        | Three quarters         | 8 (5.0)                                         | 43 (2.3)                        | <b>3.44 (1.55–7.66)</b>  | <b>2.53 (1.08–5.97)</b>  |                                |
|        | Almost always          | 10 (6.3)                                        | 29 (1.5)                        | <b>6.38 (2.97–13.72)</b> | <b>4.55 (1.99–10.39)</b> |                                |
| Female | Contact cooling        | Never                                           | 189 (78.4)                      | 1,718 (85.8)             | Reference                | Reference                      |
|        |                        | One tenth                                       | 31 (12.9)                       | 205 (10.2)               | 1.38 (0.92–2.06)         | 1.13 (0.73–1.76)               |
|        |                        | One quarter                                     | 8 (3.3)                         | 42 (2.1)                 | 1.73 (0.80–3.74)         | 1.60 (0.71–3.60)               |
|        |                        | Half                                            | 6 (2.5)                         | 15 (0.7)                 | <b>3.64 (1.39–9.48)</b>  | 2.30 (0.78–6.82)               |
|        |                        | Three quarters                                  | 3 (1.2)                         | 11 (0.5)                 | 2.48 (0.69–8.97)         | 2.09 (0.53–8.23)               |
|        |                        | Almost always                                   | 4 (1.7)                         | 11 (0.5)                 | <b>3.31 (1.04–10.48)</b> | 2.19 (0.57–8.37)               |
|        |                        | Ambient cooling                                 | Never                           | 168 (68.9)               | 1,509 (75.1)             | Reference                      |
|        | One tenth              | 40 (16.4)                                       | 295 (14.7)                      | 1.22 (0.84–1.76)         | 1.14 (0.76–1.69)         |                                |
|        | One quarter            | 22 (9.0)                                        | 124 (6.2)                       | 1.59 (0.99–2.58)         | <b>1.78 (1.07–2.96)</b>  |                                |
|        | Half                   | 10 (4.1)                                        | 56 (2.8)                        | 1.60 (0.80–3.20)         | 1.44 (0.68–3.08)         |                                |
|        | Three quarters         | 1 (0.4)                                         | 17 (0.8)                        | 0.53 (0.07–4.00)         | 0.55 (0.07–4.25)         |                                |
|        | Almost always          | 3 (1.2)                                         | 9 (0.4)                         | 2.99 (0.80–11.17)        | 2.25 (0.57–8.93)         |                                |
|        | Severe ambient cooling | Never                                           | 172 (70.8)                      | 1,631 (81.4)             | Reference                | Reference                      |
|        | One tenth              | 37 (15.2)                                       | 247 (12.3)                      | 1.42 (0.97–2.08)         | 1.35 (0.90–2.03)         |                                |
|        | One quarter            | 18 (7.4)                                        | 61 (3.0)                        | <b>2.80 (1.62–4.84)</b>  | <b>2.98 (1.68–5.26)</b>  |                                |
|        | Half                   | 7 (2.9)                                         | 36 (1.8)                        | 1.84 (0.81–4.21)         | 1.58 (0.63–3.96)         |                                |
|        | Three quarters         | 2 (0.8)                                         | 14 (0.7)                        | 1.36 (0.31–6.01)         | 1.33 (0.29–6.02)         |                                |
|        | Almost always          | 7 (2.9)                                         | 14 (0.7)                        | <b>4.74 (1.89–11.91)</b> | <b>3.27 (1.05–10.16)</b> |                                |

OR odds ratio, NRS numerical rating scale, 95% CI ninety-five percent confidence interval

<sup>a</sup> Adjusted for age, gender, body mass index, current daily smoking, diabetes mellitus, joint disease, and hand-arm vibration exposure

Bold values are significant at the 0.05 level

**Table 6** Interaction between occupational cold and hand-arm vibration exposures in relation to symptoms of carpal tunnel syndrome

| <b>Exposure variables</b>     |                           | <b>Carpal tunnel syndrome/Total</b> | <b>Simple analyses</b>   | <b>Multiple analyses <sup>a</sup></b> | <b>Relative excess risk</b>            |
|-------------------------------|---------------------------|-------------------------------------|--------------------------|---------------------------------------|----------------------------------------|
| Proportion of working hours   |                           | N                                   | OR (95% CI)              | OR (95% CI)                           | <b>due to interaction <sup>b</sup></b> |
| <u>Contact cooling</u>        | <u>Hand-arm vibration</u> |                                     |                          |                                       |                                        |
| Never                         | Never                     | 230/2,970                           | Reference                | Reference                             |                                        |
| Never                         | Every day                 | 0/10                                | 1.0 (-)                  | 1.0 (-)                               |                                        |
| Half the time or more         | Never                     | 8/53                                | 2.09 (0.97–4.48)         | 1.51 (0.64–3.54)                      |                                        |
| Half the time or more         | Every day                 | 7/27                                | <b>4.33 (1.80–10.40)</b> | <b>4.93 (1.76–13.83)</b>              | 3.42                                   |
| <u>Ambient cooling</u>        | <u>Hand-arm vibration</u> |                                     |                          |                                       |                                        |
| Never                         | Never                     | 198/2,559                           | Reference                | Reference                             |                                        |
| Never                         | Every day                 | 1/13                                | 0.98 (0.13–7.56)         | 1.35 (0.16–10.99)                     |                                        |
| Half the time or more         | Never                     | 11/147                              | 0.95 (0.51–1.78)         | 0.86 (0.43–1.69)                      |                                        |
| Half the time or more         | Every day                 | 5/24                                | <b>3.26 (1.20–8.87)</b>  | <b>3.90 (1.29–11.82)</b>              | 2.69                                   |
| <u>Severe ambient cooling</u> | <u>Hand-arm vibration</u> |                                     |                          |                                       |                                        |
| Never                         | Never                     | 191/2,610                           | Reference                | Reference                             |                                        |
| Never                         | Every day                 | 1/9                                 | 1.56 (0.19–12.52)        | 2.13 (0.22–20.78)                     |                                        |
| Half the time or more         | Never                     | 21/172                              | <b>1.77 (1.09–2.86)</b>  | 1.65 (0.96–2.84)                      |                                        |
| Half the time or more         | Every day                 | 3/9                                 | <b>6.23 (1.55–25.12)</b> | <b>9.36 (2.11–41.47)</b>              | 6.58                                   |

<sup>a</sup> Adjusted for age, gender, body mass index, current daily smoking, diabetes mellitus, joint disease, and heavy manual handling

<sup>b</sup> Calculated based on odds ratios from multiple analyses, where a value >0 indicate a positive additive interaction effect

Bold values are significant at the 0.05 level
